# Supplementary material for: Coordination modes of bridge carboxylates in dinuclear manganese compounds determine their catalase-like activities
Source: Royal Society of Chemistry journal article supplement (doi:10.1039/b907687e), 2009-01-01
Supplement: b907687e.pdf [file b907687e.pdf]

**Table S1.**

|          | $\nu_{\text{as}}\text{COO}^-$ | $\nu\text{C}=\text{N}, \nu\text{C}=\text{C}$ | $\nu_{\text{s}}\text{COO}^-$ | $\nu\text{ClO}_4^-$ | $\nu\text{H}_2\text{O}$ | 600-700 $\text{cm}^{-1}$ |
|----------|-------------------------------|----------------------------------------------|------------------------------|---------------------|-------------------------|--------------------------|
| <b>1</b> | 1604,                         | 1573 , 1553                                  | 1444                         | 1144,1116,1090      | 3424                    | 627                      |
| <b>2</b> | 1604                          | 1575                                         | 1444, 1402                   | 1119, 1090          | 3439                    | 626                      |
| <b>3</b> | 1604,                         | 1593                                         | 1444, 1401, 1384             | 1146, 1088          | 3424                    | 626                      |

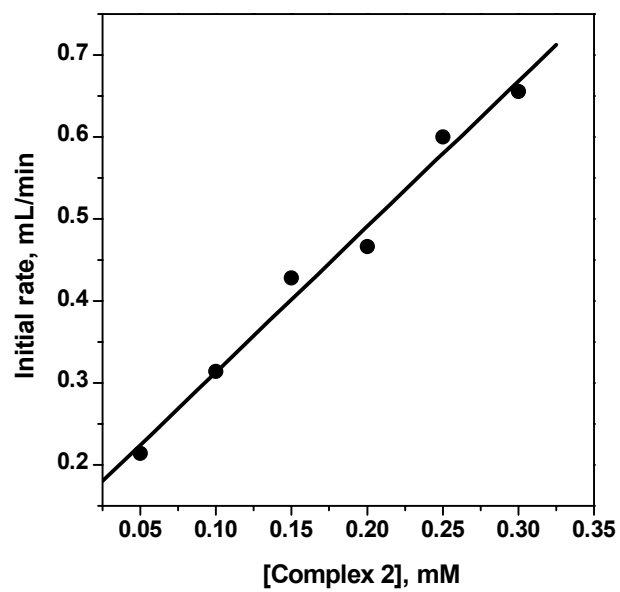

Figure S1.

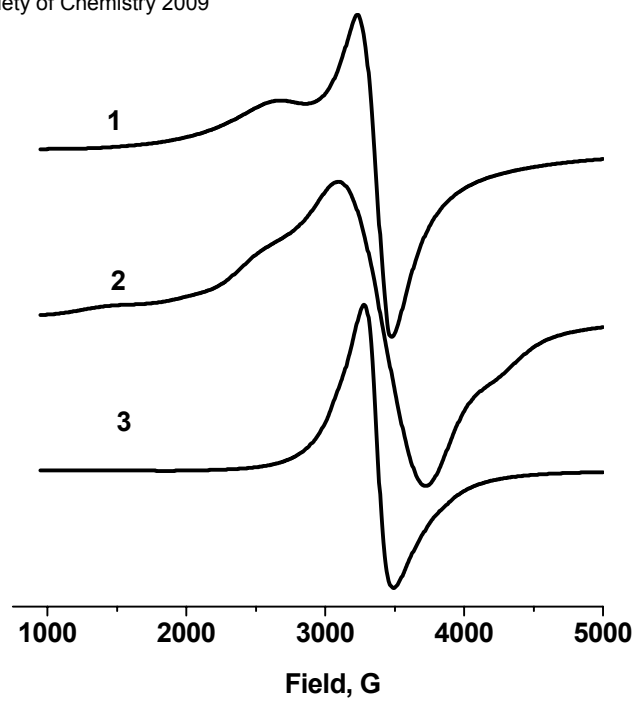

**Figure S2.**

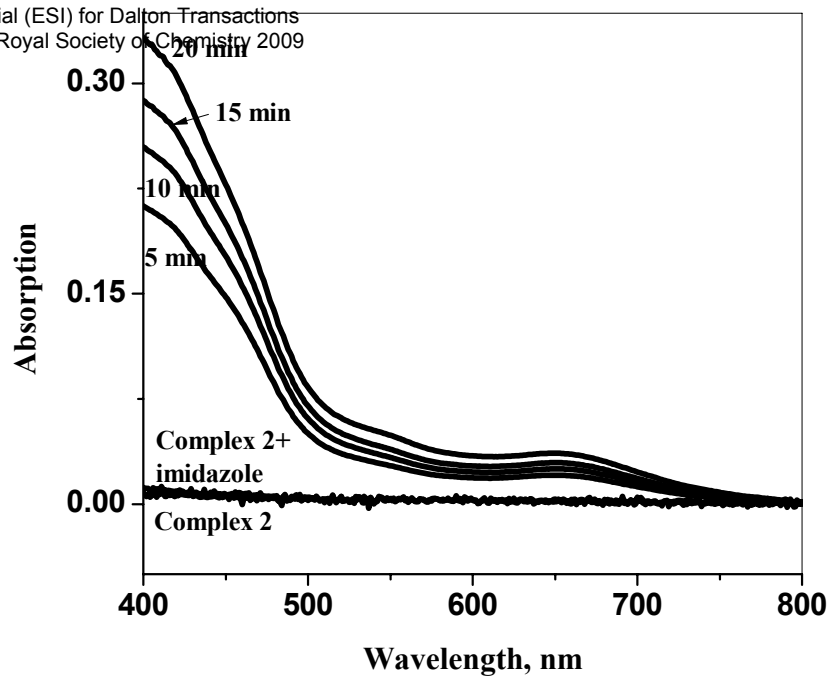

Figure S3.
